# Supplementary material
Source: Springer Nature journal article supplement (https://www.springermedizin.de/resource/supplementary/12891_2008_578_MOESM4_ESM.pdf/9511376)
Supplement: MOESM4 [file 9511376]

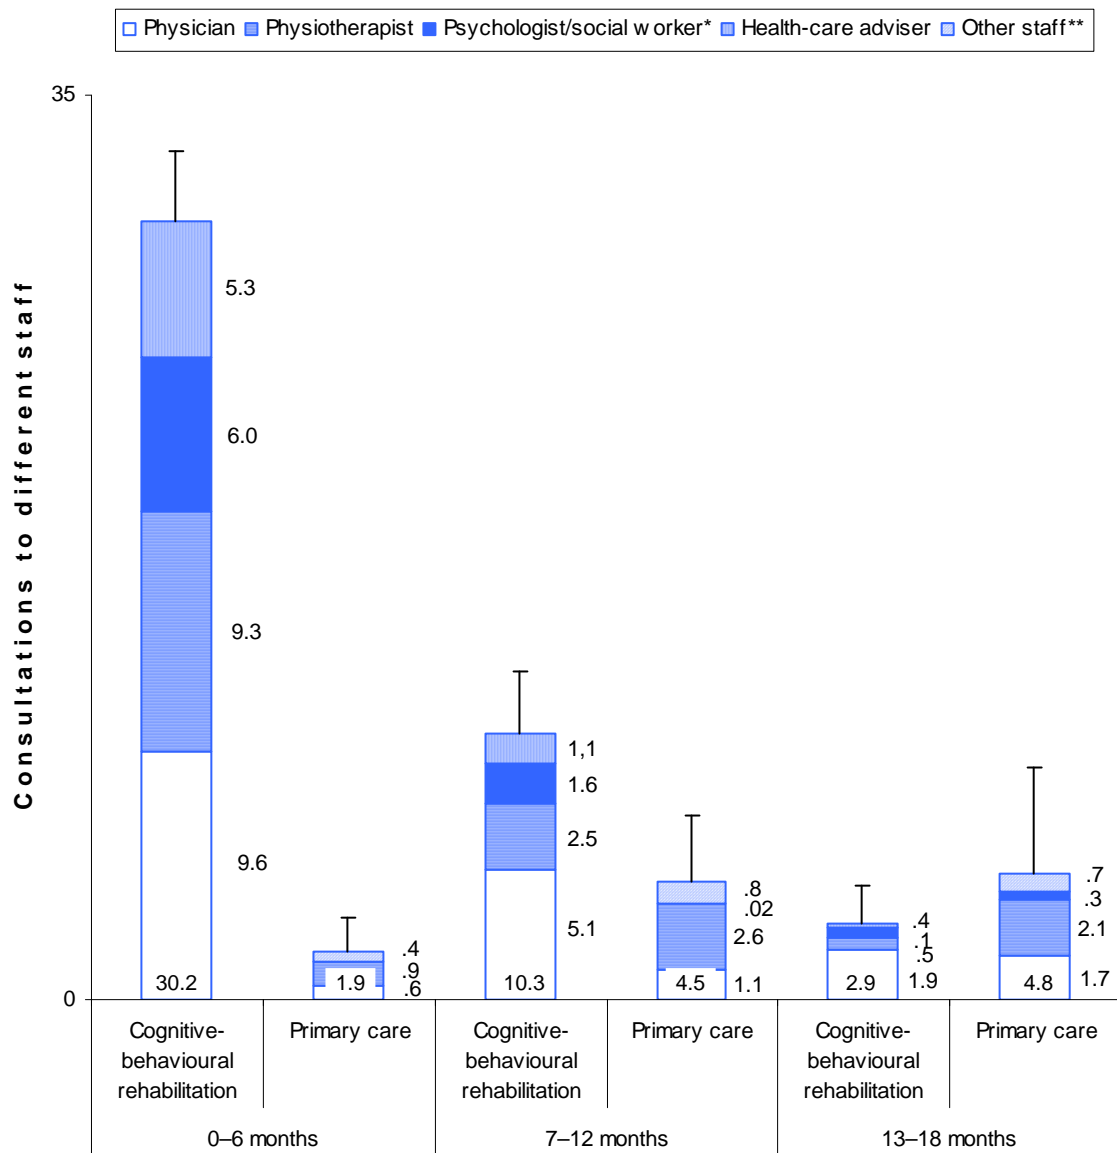

\*Concerning primary care, social worker was the only option.

\*\*= Occupational therapist, nurse, X-ray/MRI staff, laboratory personnel, and complementary-medicine staff (for example, masseur and “Chinese doctor”).
